Zhan J, Irudayam MJ, Nakamura Y, Kurita R, Nienhuis AW. High level of fetal-globin reactivation by designed transcriptional activator-like effector. *Blood Adv.* 2020;4(4):687-695.

In the data sharing footnote on page 687, the contact information for Jun Zhan was omitted. The error has been corrected in the published article.

---

DOI 10.1182/bloodadvances.2020001766

© 2020 by The American Society of Hematology
